# Supplementary material for: Decoration of mesoporous carbon electrodes with tin oxide to boost their supercapacitive performance
Source: Royal Society of Chemistry journal article supplement (doi:10.1039/d0nj02585b), 2020-01-01
Supplement: d0nj02585b1.pdf [file d0nj02585b1.pdf]

Supporting Information  
for

**Decoration of mesoporous carbon electrodes with tin oxide to  
boost their supercapacitive performance**

Hang T. T. Le <sup>a,\*</sup>, Duc Tung Ngo <sup>b</sup>, Viet-Anh-Dung Dang <sup>a</sup>, Thuy T. B. Hoang <sup>a</sup>,  
Chan-Jin Park <sup>c,\*</sup>

<sup>a</sup> *Department of Electrochemistry and Corrosion Protection, School of Chemical Engineering,  
Hanoi University of Science and Technology, 1 Dai Co Viet Road, Hanoi, Vietnam.*

<sup>b</sup> *Research and Development Center, Hyundai aluminum Vina shareholding company, Van  
Lam, Hung Yen, Vietnam.*

<sup>c</sup> *Department of Materials Science and Engineering, Chonnam National University, 77,  
Yongbongro, Bukgu, Gwangju 61186, South Korea.*

\*Corresponding authors

Tel: +82-62-530-1704; Fax: +82-62-530-1699

E-mail addresses: [hang.lethithu@hust.edu.vn](mailto:hang.lethithu@hust.edu.vn) (H.T.T. Le); [parkcj@jnu.ac.kr](mailto:parkcj@jnu.ac.kr) (C.-J. Park)

**Table S1.** Comparison of electrochemical performance of SnO<sub>2</sub>-carbon composite electrodes for supercapacitors

| Materials                                                                    | Highest capacitance                                 | Cycling stability (Retention)            | Electrolyte                          | Synthesis approach                                        | References |
|------------------------------------------------------------------------------|-----------------------------------------------------|------------------------------------------|--------------------------------------|-----------------------------------------------------------|------------|
| 15-SNC/300                                                                   | 344 F g <sup>-1</sup> at 5 mV s <sup>-1</sup>       | 92.4%/5000 cycles/50 mVs <sup>-1</sup>   | 1M K <sub>2</sub> SO <sub>4</sub>    | Incipient wetness technique and redox reaction            | This work  |
| Mosaic-structured SnO <sub>2</sub> @C porous microspheres                    | 420 F g <sup>-1</sup> at 1 A g <sup>-1</sup>        | 91% /2000 cycles/1 A g <sup>-1</sup>     | 1M Na <sub>2</sub> SO <sub>4</sub>   | Ethanol-thermal carbonization and simple steam activation | 1          |
| Carbon-coated hollow SnO <sub>2</sub> microspheres                           | 43.3 F g <sup>-1</sup> at 10 mV s <sup>-1</sup>     | -                                        | 1M KOH                               | Template assisted method and calcination treatment        | 2          |
| SnO <sub>2</sub> nanoclusters wrapped functionalized carbonized cotton cloth | 197.7 F g <sup>-1</sup> at 1 A g <sup>-1</sup>      | 95.5%/5000 cycles/15 A g <sup>-1</sup>   | 1M Na <sub>2</sub> SO <sub>4</sub>   | Solvothermal reaction and calcination process             | 3          |
| SnO <sub>2</sub> dots decorated porous carbon nanofibers                     | 225.4 F g <sup>-1</sup> at 1 A g <sup>-1</sup>      | ~119.8%/ 2500 cycles                     | 3 M KOH                              | Mild redox reaction                                       | 4          |
| SnO <sub>2</sub> /graphene nanocomposites                                    | 363.3 F g <sup>-1</sup> at 10 mV s <sup>-1</sup>    | -                                        | 1M Na <sub>2</sub> SO <sub>4</sub>   | Solvothermal method                                       | 5          |
| SnO <sub>2</sub> @CNT nanocomposites                                         | 188.42 F g <sup>-1</sup> at 2 mV s <sup>-1</sup>    | ~75% /1000 cycles/200 mV s <sup>-1</sup> | 2 M KCl                              | Screen-printing and sintering                             | 6          |
| SnO <sub>2</sub> nanosheets on carbon cloth                                  | 247 F g <sup>-1</sup> at 1 A g <sup>-1</sup>        | 76.9% /10000 cycles/3 A g <sup>-1</sup>  | 0.5 M LiNO <sub>3</sub>              | Hydrothermal reactions and subsequent thermal treatments  | 7          |
| Nitrogen doped graphene oxide@SnO <sub>2</sub>                               | ~378 F g <sup>-1</sup> at 4 A g <sup>-1</sup>       | 89%/5000 cycles/4 A g <sup>-1</sup>      | 6 M KOH                              | Thermal reduction                                         | 8          |
| Carbon coated-SnO <sub>2</sub> nanospheres                                   | 195 F g <sup>-1</sup> at 1 A g <sup>-1</sup>        | 90%/ 2000 cycles/2 A g <sup>-1</sup>     | 4.5 M H <sub>2</sub> SO <sub>4</sub> | Sintering                                                 | 9          |
| SnO <sub>2</sub> /MWCNT                                                      | 133.33 F g <sup>-1</sup> at 0.5 mA cm <sup>-2</sup> | -                                        | 1M Na <sub>2</sub> SO <sub>4</sub>   | Sonochemical synthesis                                    | 10         |
| Nitrogen-doped reduced graphene oxide/SnO <sub>2</sub> composite             | 437 F g <sup>-1</sup> at 5 mV s <sup>-1</sup>       | 90% /1000 cycles/2 A g <sup>-1</sup>     | 1M Na <sub>2</sub> SO <sub>4</sub>   | One-step hydrothermal method                              | 11         |
| SnO <sub>2</sub> /carbon aerogel composite                                   | 119.2 F g <sup>-1</sup> at 1 mV s <sup>-1</sup>     | -                                        | 1 M H <sub>2</sub> SO <sub>4</sub>   | Impregnation method                                       | 12         |
| Gasified rice husk porous carbon/S-doped SnO <sub>2</sub> composite          | 215 F g <sup>-1</sup> at 1.5 A g <sup>-1</sup>      | 78.5%/5000 cycles/0.4 A g <sup>-1</sup>  | 6 M KOH                              | Hydrothermal reaction                                     | 13         |
| Hexagonal- shaped SnO <sub>2</sub> @C nano                                   | 37.8 F g <sup>-1</sup> at 5 mV s <sup>-1</sup>      | -                                        | 1 M H <sub>2</sub> SO <sub>4</sub>   | Reaction under autogenic pressure at elevated temperature | 14         |

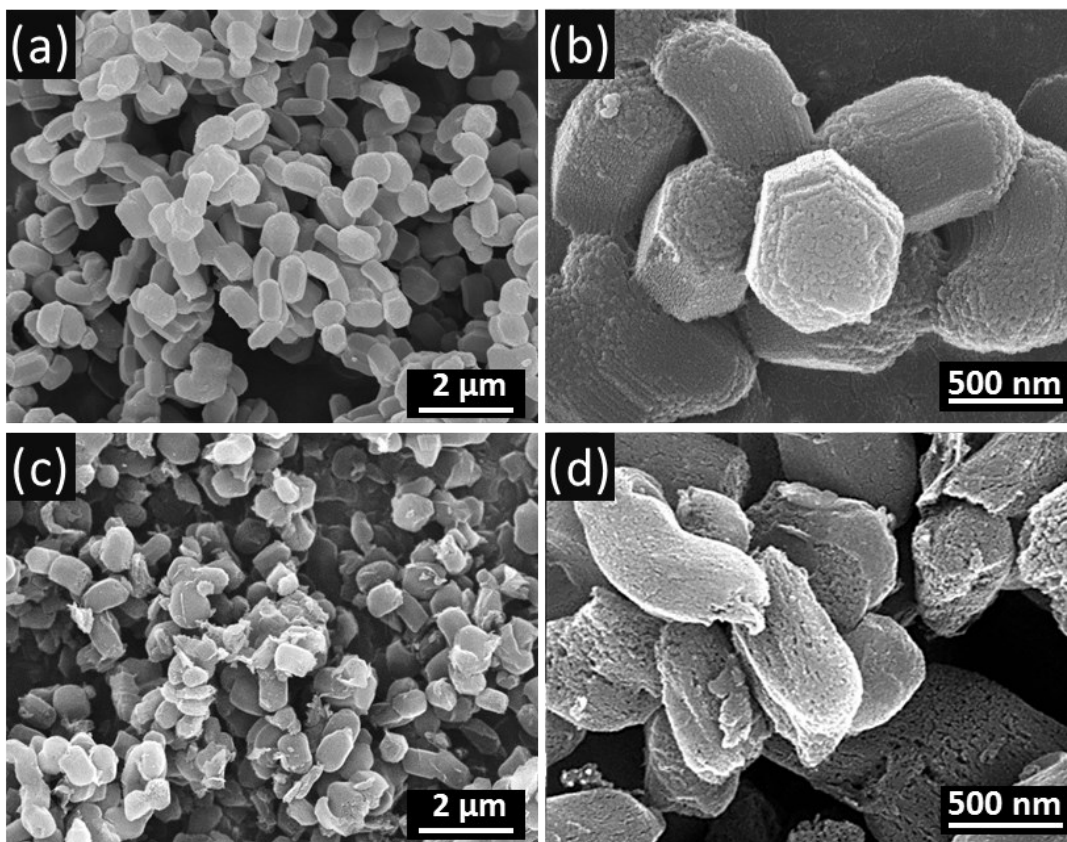

**Fig. S1.** SEM images of (a, b) SBA-15, and (c, d) N-CMK3.

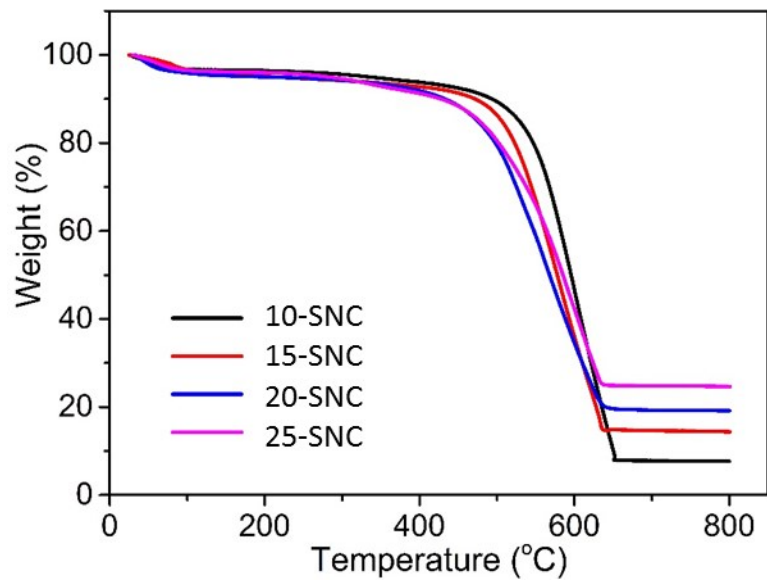

**Fig. S2.** TGA plots of SNC composites in air at a heating rate of 10 °C min<sup>-1</sup>.

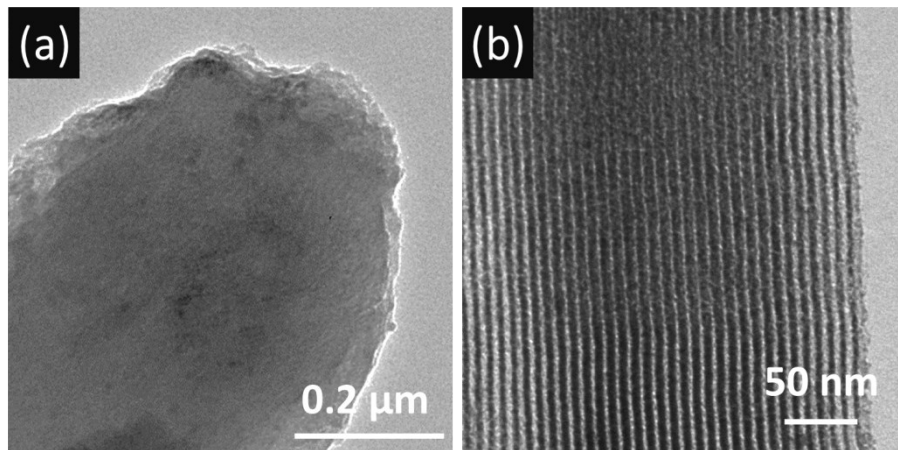

**Fig. S3.** (a) Low- and (b) high-resolution TEM images of N-CMK3.

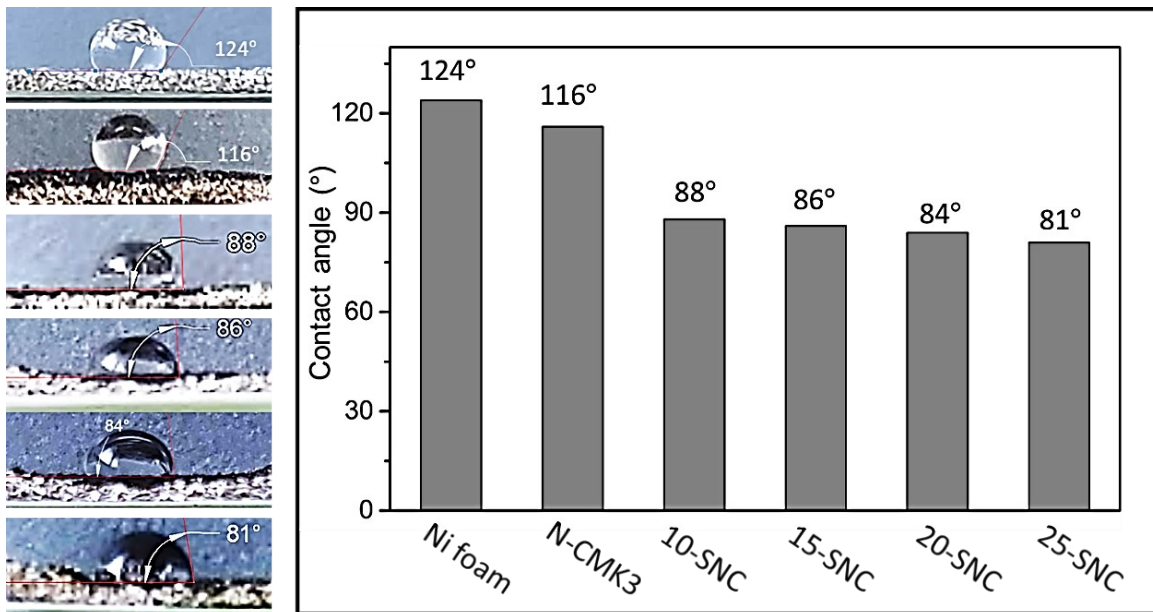

**Fig. S4.** Droplet contact angles for water droplets as a function of SnO<sub>2</sub> content loading of SNC composites.

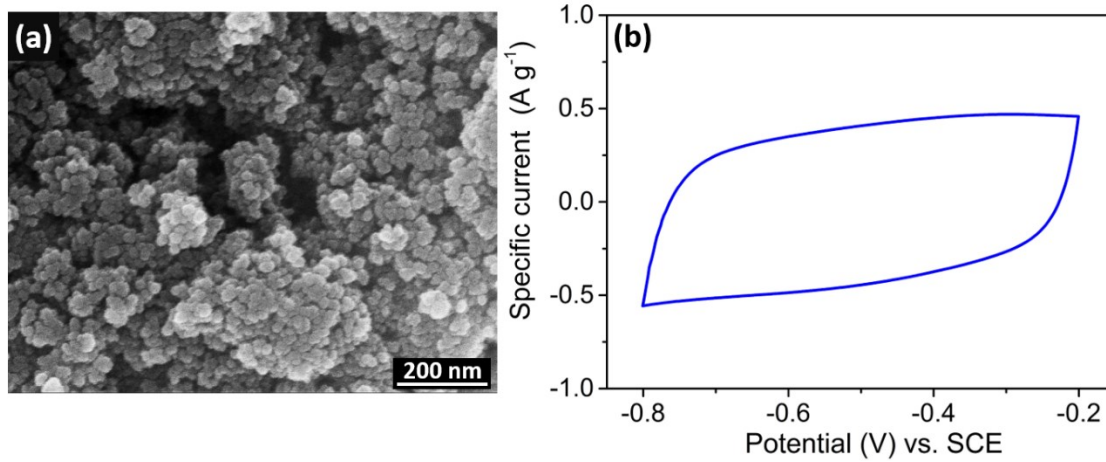

**Fig. S5.** (a) SEM image and (b) CV plot of the SnO<sub>2</sub> electrode in 1 M Na<sub>2</sub>SO<sub>4</sub> at a scan rate of 5 mV s<sup>-1</sup>.

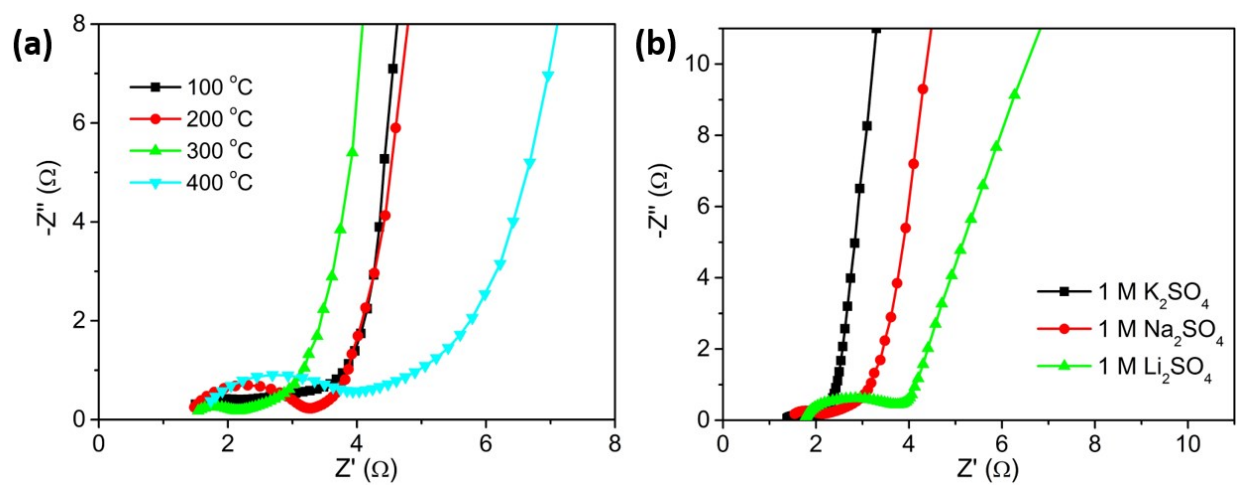

**Fig. S6.** Impedance spectra of the (a) 15-SNC composite after exposure to heat at temperatures ranging from 100 °C to 400 °C and (b) 15-SNC/300 in aqueous electrolytes of sulfate salts.



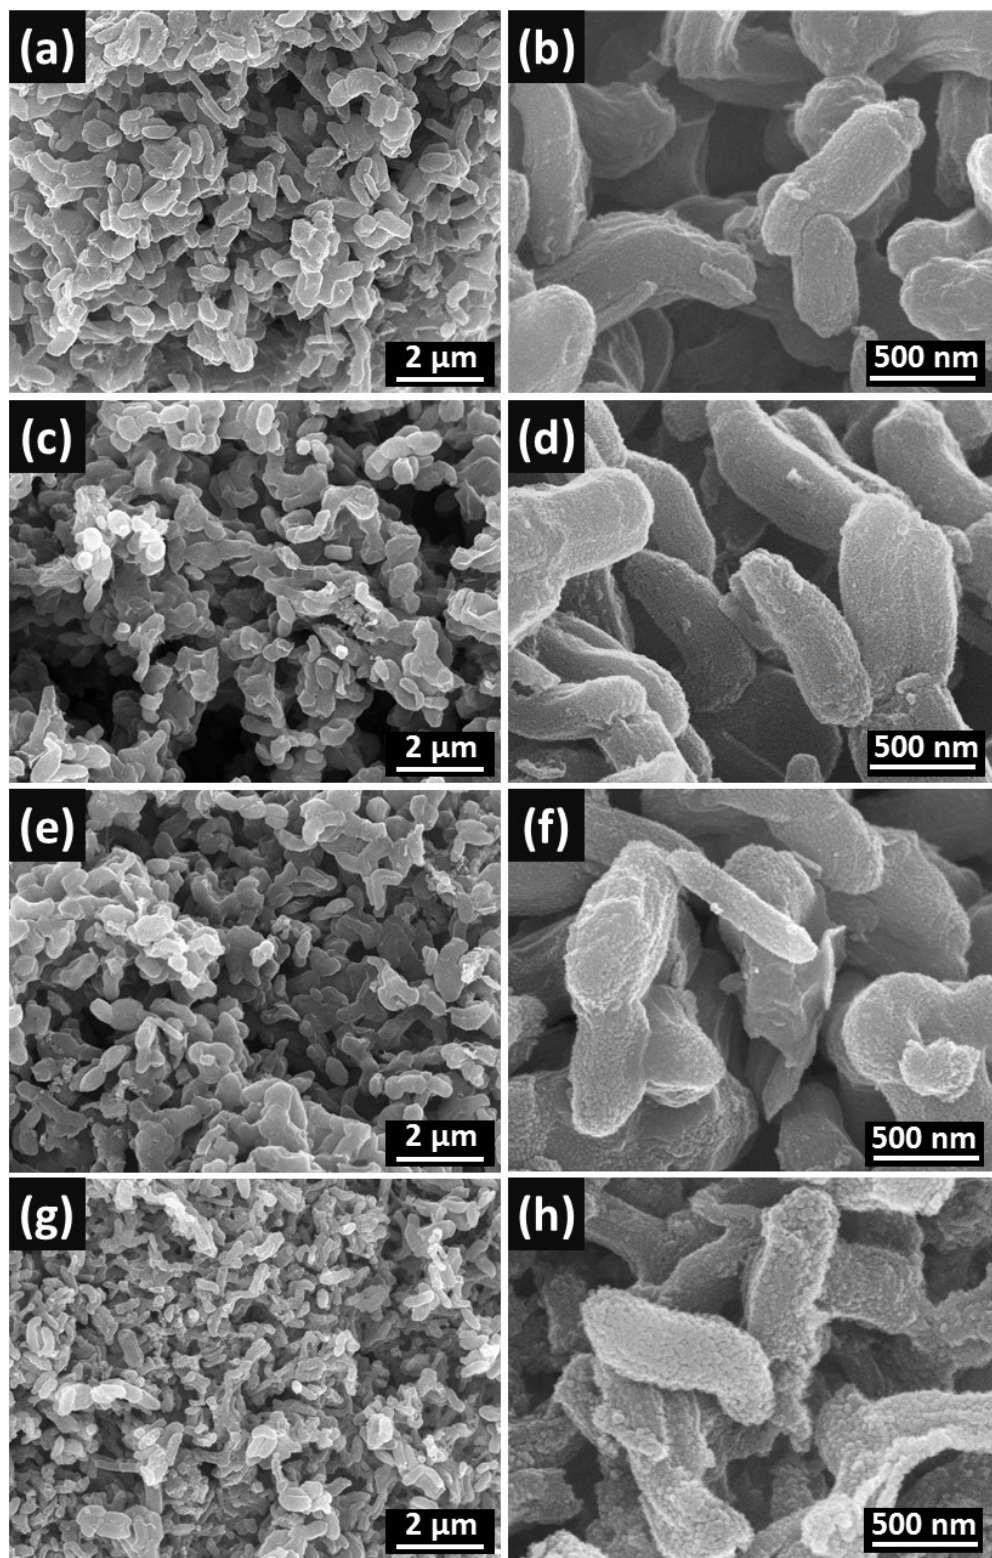

**Fig. S7.** Low- and high-resolution SEM images of 15-SNC annealed at different temperatures:  
(a, b) 100 °C, (c, d) 200 °C, (e, f) 300 °C, (g, h) 400 °C.



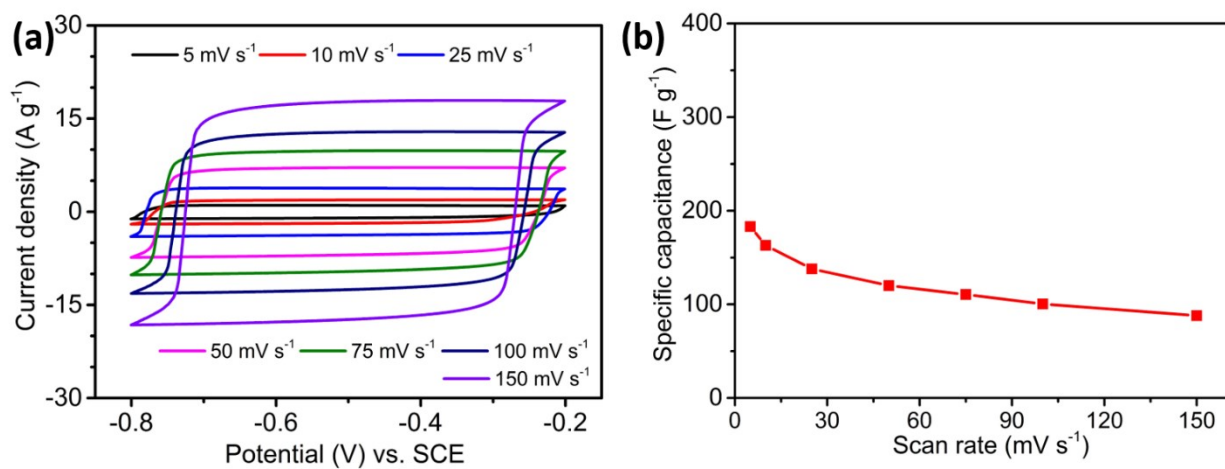

**Fig. S8.** Cyclic performance of the N-CMK3 electrode in 1 M K<sub>2</sub>SO<sub>4</sub> electrolyte: (a) CV plot at different scan rates, (b) dependence of the specific capacitance on the scan rate.

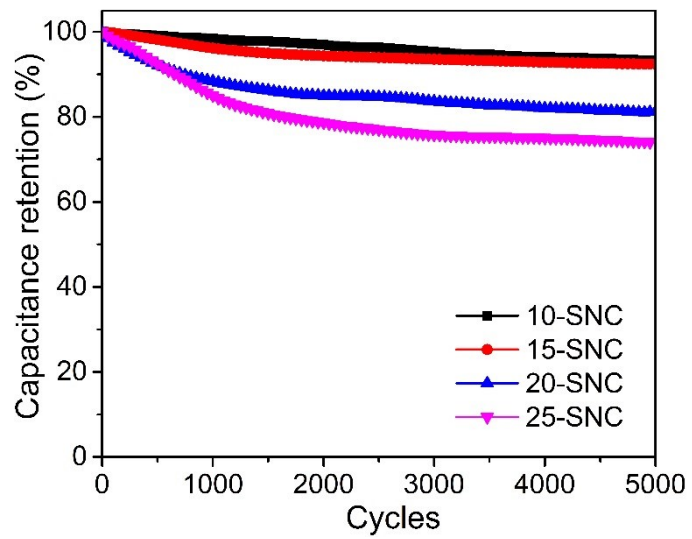

**Fig. S9.** Capacitance retention of different SNC composite electrodes in 1 M  $K_2SO_4$  electrolyte for 5000 cycles at a scan rate of  $50 \text{ mV s}^{-1}$ .

## References

1. C. He, Y. Xiao, H. Dong, Y. Liu, M. Zheng, K. Xiao, X. Liu, H. Zhang and B. Lei, *Electrochimica Acta*, 2014, **142**, 157-166.
2. S. Ren, Y. Yang, M. Xu, H. Cai, C. Hao and X. Wang, *Colloids and Surfaces A: Physicochemical and Engineering Aspects*, 2014, **444**, 26-32.
3. X. Hong, S. Li, R. Wang and J. Fu, *Journal of Alloys and Compounds*, 2019, **775**, 15-21.
4. Y. Liu, J. Zhou, L. Chen, P. Zhang, W. Fu, H. Zhao, Y. Ma, X. Pan, Z. Zhang, W. Han and E. Xie, *ACS Applied Materials & Interfaces*, 2015, **7**, 23515-23520.
5. S. P. Lim, N. M. Huang and H. N. Lim, *Ceramics International*, 2013, **39**, 6647-6655.
6. C.-H. Xu and J.-Z. Chen, *Ceramics International*, 2016, **42**, 14287-14291.
7. Y. Zhang, Z. Hu, Y. Liang, Y. Yang, N. An, Z. Li and H. Wu, *Journal of Materials Chemistry A*, 2015, **3**, 15057-15067.
8. O. Kwon, B. K. Deka, J. Kim and H. W. Park, *International Journal of Energy Research*, 2018, **42**, 490-498.
9. V. Naresh and S. K. Martha, *Journal of The Electrochemical Society*, 2019, **166**, A551-A558.
10. V. Vinoth, J. J. Wu, A. M. Asiri, T. Lana-Villarreal, P. Bonete and S. Anandan, *Ultrasonics Sonochemistry*, 2016, **29**, 205-212.
11. J. Ji, H. Zhou, L. Xiong, L. Li, X. Yu and L. Wei, *Materials Research Express*, 2019, **6**, 0850g0857.
12. S.-W. Hwang and S.-H. Hyun, *Journal of Power Sources*, 2007, **172**, 451-459.
13. H. Wang, D. Wu, J. Zhou and G. Yang, *BioResources*, 2019, **14**, 5964-5979.
14. R. K. Selvan, I. Perelshtein, N. Perkas and A. Gedanken, *The Journal of Physical Chemistry C*, 2008, **112**, 1825-1830.
